# Supplementary material
Source: publisher figshare collection journal article supplement (https://acs.figshare.com/ndownloader/files/6893108)
Supplement: Supplementary file 1 [file 6893108]

## Supporting Information

### Cell-based high-throughput screening assay identifies 2', 2'-difluoro-2'-deoxycytidine Gemcitabine as potential anti-poliovirus agent

Zhuoran Zhang<sup>1,#</sup>, Enzhuo Yang<sup>1,#</sup> and Chunmiao Hu<sup>1,#</sup>, Han Cheng<sup>1</sup>, Crystal Y. Chen<sup>1</sup>, Dan Huang<sup>1</sup>, Richard Wang<sup>1</sup>, Yue Zhao<sup>1</sup>, Lijun Rong<sup>1</sup>, Marco Vignuzzi<sup>2</sup>, Hongbo Shen<sup>3</sup>, Ling Shen<sup>1</sup> and Zheng W. Chen<sup>1\*</sup>

1. Department of Microbiology and Immunology and Center for Primate Biomedical Research, University of Illinois College of Medicine, 909 S. Wolcott Ave, E704, M/C790, Chicago, IL 60612;

2. Institut Pasteur, Viral Populations and Pathogenesis Unit, CNRS UMR 3569, 25-28 rue du Dr. Roux, 75724 Paris cedex 15, France;

3. Institut Pasteur of Shanghai, 411 Hefei Rd, Shanghai, 200025, China

# Equal contribution

\* Correspondence: Prof. Zheng W. Chen, 909 S. Wolcott Ave, E704, M/C790, Chicago, IL 60612; E-mail:

[zchen@uic.edu](mailto:zchen@uic.edu); additional correspondence: Dr. Ling Shen, [lshen@uic.edu](mailto:lshen@uic.edu)

**Contents:**

Figure S1. Growth pattern of Sb-GLuc and Sb-WT

Figure S2. Itraconazole and Ketoconazole confer partial protective effects on HeLa cells against WT-PV infection.

Figure S3. Inhibition of PV replication and cell viability on 293T and Vero cells.

Figure S4. Daily dosage of Gemcitabine confers inhibitory effect against PV

Figure S5. 25 $\mu$ M Gemcitabine completely inhibits WT-PV replication in HeLa cells

Figure S6. In vitro DNA elongation using human DNA polymerase  $\alpha$ .

Figure S7, Gemcitabine treatment confers subtle and reversible changes in immune cell counts or liver/kidney functions.

Table S1. Other forms of nucleoside analogs do not remarkably inhibit PV replication

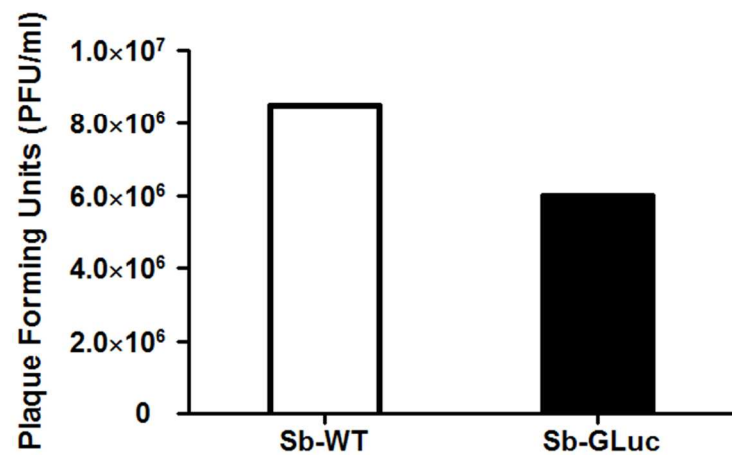

**Figure S1. Growth pattern of Sb-GLuc and Sb-WT**

HeLa cells were infected by Luciferase construct (Sb-GLuc) or wild type Sabin strain (Sb-WT).

Plaque assays were performed after 3-day incubation.

a.

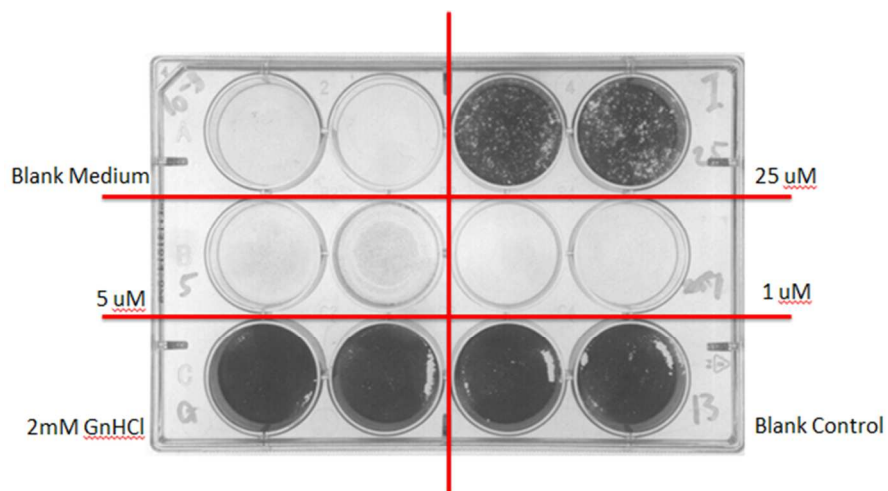

b.

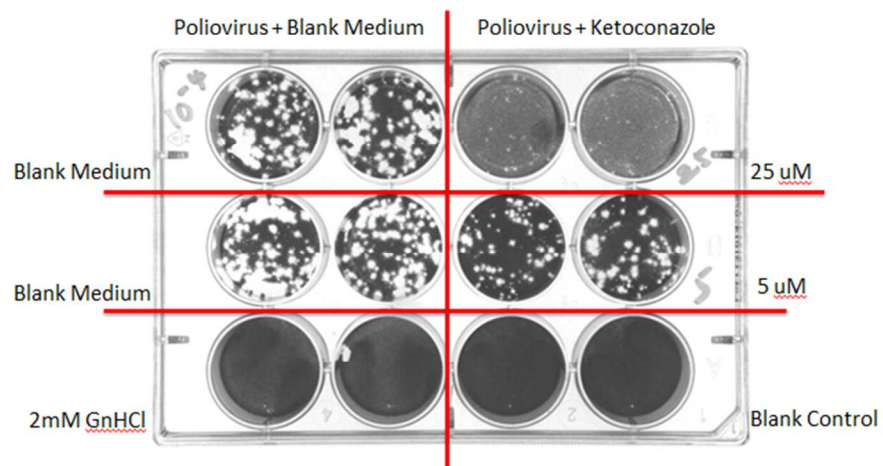

**Figure S2. Itraconazole and Ketoconazole confer partial protective effects on HeLa cells against WT-PV infection.**

a)  $10^6$  HeLa cells were infected by  $2 \times 10^5$  PFU WT-PV (M.O.I. = 0.2) and treated with 0, 5 or 25 $\mu$ M of Itraconazole.

b)  $10^6$  HeLa cells were infected by  $2 \times 10^4$  PFU WT-PV (M.O.I. = 0.02) and treated with 0, 5 or 25 $\mu$ M of Ketoconazole.

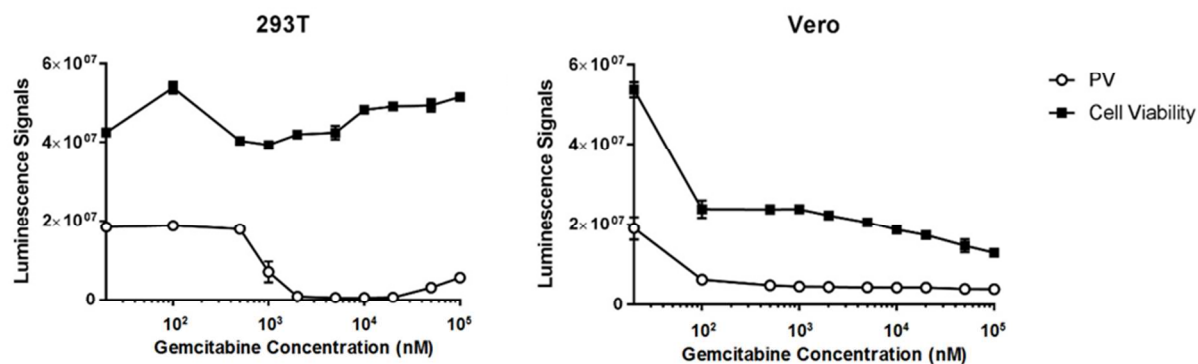

**Figure S3. Inhibition of PV replication and cell viability on 293T and Vero cells.** 293T cells and Vero cells were treated in the same condition as HeLa cell. Gemcitabine inhibited PV viral replication without cytotoxic effect in 293T cells. Vero cells are sensitive to Gemcitabine treatment and the inhibitory effect on PV replication is likely due to the cytotoxic effect in the cells.

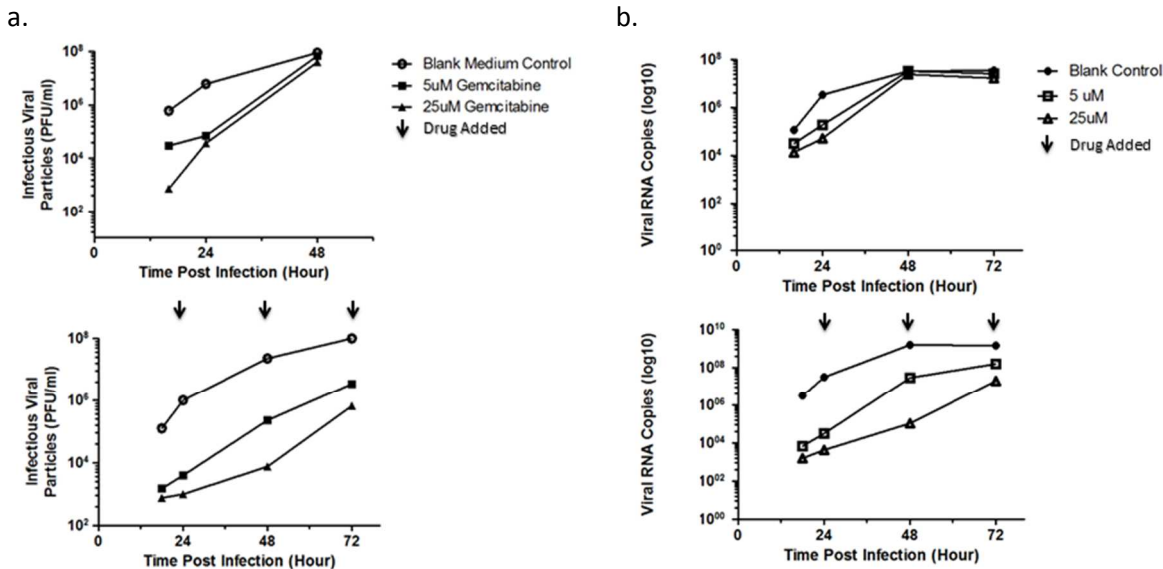

**Figure S4. Daily dosage of Gemcitabine confers inhibitory effect against PV**

- a) PFUs of WT-PV treated by Gemcitabine. WT-PV  $10^6$  HeLa cells were infected by  $2 \times 10^4$  PFU WT-PV (M.O.I. = 0.02) and treated with 0, 5 or 25 $\mu$ M of Gemcitabine. The drug was delivered either at the beginning of the incubation (upper) or every 24-hour (down). The arrows indicate the administration of additional dosages. Virus were harvested after 16, 24, 48 and 72-hour incubation, and the PFU were determined by plaque assays.
- b) Viral RNA copy numbers of WT-PV treated by Gemcitabin. WT-PV  $10^6$  HeLa cells were infected by  $2 \times 10^4$  PFU WT-PV (M.O.I. = 0.02) and treated with 0, 5 or 25 $\mu$ M of Gemcitabine. The drug was delivered either at the beginning of the incubation (upper) or every 24-hour (down). The arrows indicate the administration of additional dosages. Virus were harvested after 16, 24, 48 and 72-hour incubation, and the viral RNA copy numbers were determined by aRT-PCR

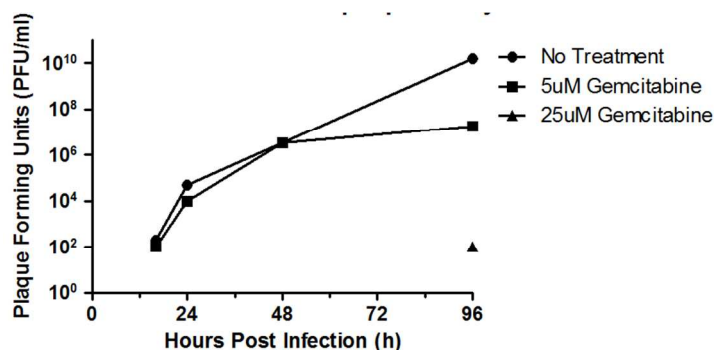

**Figure S5. 25μM Gemcitabine completely inhibits WT-PV replication in HeLa cells**

$4 \times 10^5$  HeLa cells were infected by 100 PFU WT-PV, and 0, 5 or 25μM of Gemcitabine was added every 24 hours during the incubation. Virus was harvested after 16, 24, 48 and 72-hour incubation, and the PFU were determined by plaque assays.

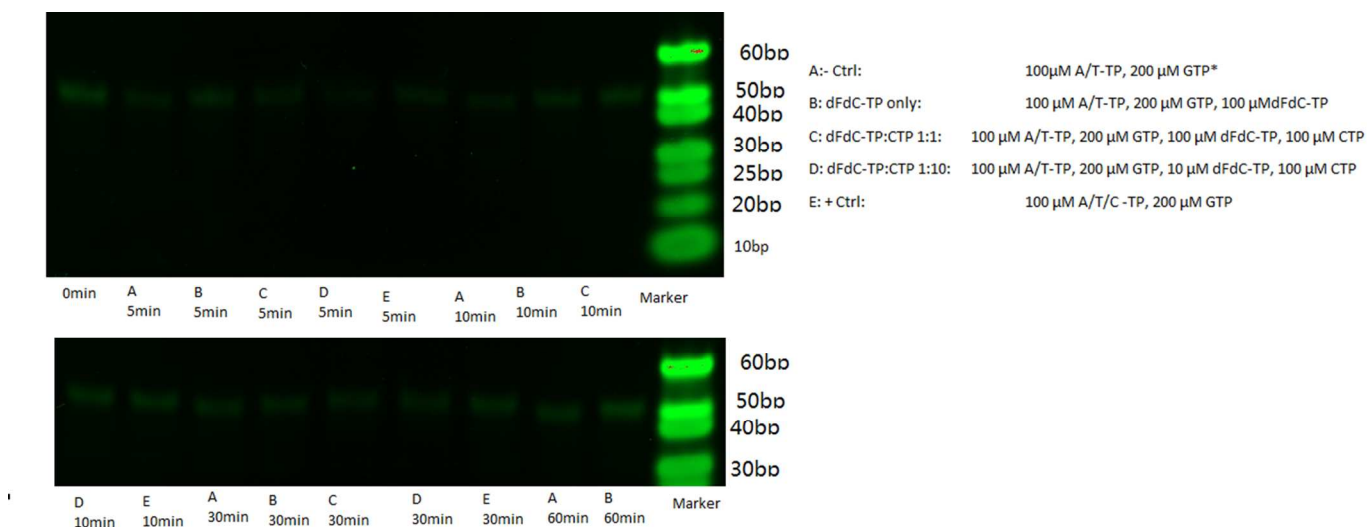

**Figure S6. In vitro DNA elongation using human DNA polymerase  $\alpha$ .** The assay was performed following the method described in Clarke, et al. *BMC* 2015. Recombinant human DNA polymerase  $\alpha$  (ProFoldin) were incubated with different concentration of dFdC-TP and the products were collected at 5, 10, 30min.

a.

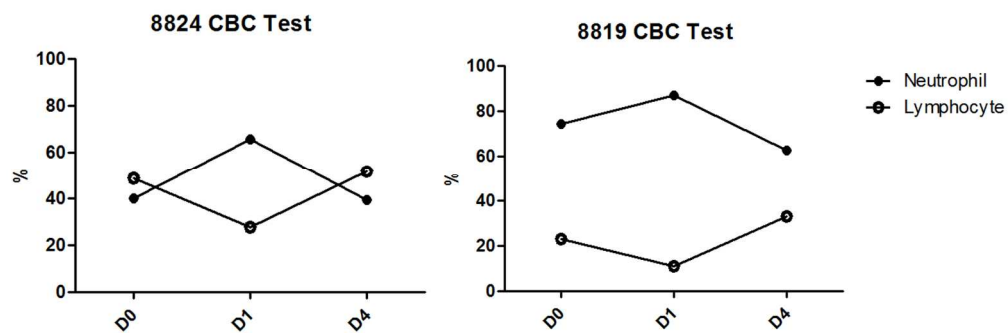

b.

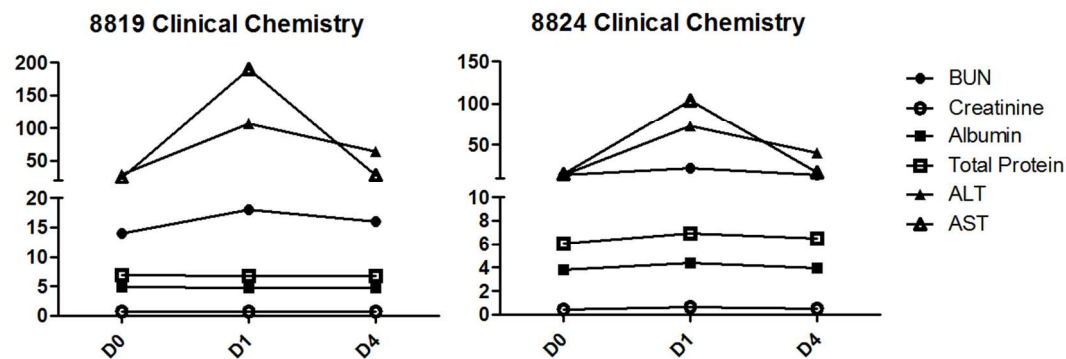

**Figure S7, Gemcitabine treatment confers subtle and reversible changes in immune cell counts or liver/kidney functions.** a) Clinical lab and b) Biochemistry test results of healthy rhesus macaques that received 24mg/kg Gemcitabine treatment. Blood were obtained before Gemcitabine administration, 1-day and 4-day post Gemcitabine administration.



**Table S1. Other forms of nucleoside analogs do not remarkably inhibit PV replication**

| <b>Index</b> | <b>Ec</b> | <b>Vc</b> | <b>Compound Name</b> | <b>Mechanism of Action</b> |
|--------------|-----------|-----------|----------------------|----------------------------|
| 01A03        | 62.71%    | 47.54%    | Azaguanine-8         | Purine antimetabolite      |
| 01C17        | 0.00%     | 93.78%    | Idoxuridine          | deoxyuridine analog        |
| 01O08        | 0.00%     | 102.77%   | Didanosine           | Adenosine analog           |
| 02C16        | 0.00%     | 99.37%    | Lamivudine           | Cytidine analog            |
| 02N12        | 43.97%    | 92.40%    | Cytarabine           | Cytidine analog            |
| 03F06        | 0.00%     | 97.53%    | Abacavir Sulfate     | Guanosine analog           |
| 03N22        | 36.25%    | 91.76%    | Stavudine            | Thymidine analog           |
| 04C14        | 0.00%     | 86.80%    | Trifluridine         | deoxyuridine analog        |
| 04F15        | 24.46%    | 85.79%    | Fludarabine          | Purine analog              |
| 04G07        | 60.28%    | 94.58%    | Ribavirin            | Guanosine analog           |
